# Supplementary material for: Characterization of 7-Methylguanosine Identified Biochemical Recurrence and Tumor Immune Microenvironment in Prostate Cancer
Source: Front Oncol. 2022 May 23;12:900203. doi: 10.3389/fonc.2022.900203 (PMC9168541; doi:10.3389/fonc.2022.900203)
Supplement: Supplementary file 3 [file Table_3.xlsx]

## Sheet: Sheet1
Genes	Source
DCP2	GOMF_M7G_5_PPPN_DIPHOSPHATASE_ACTIVITY
NUDT10	GOMF_M7G_5_PPPN_DIPHOSPHATASE_ACTIVITY
NUDT11	GOMF_M7G_5_PPPN_DIPHOSPHATASE_ACTIVITY
NUDT16	GOMF_M7G_5_PPPN_DIPHOSPHATASE_ACTIVITY
NUDT3	GOMF_M7G_5_PPPN_DIPHOSPHATASE_ACTIVITY
NUDT4	GOMF_M7G_5_PPPN_DIPHOSPHATASE_ACTIVITY
NUDT4B	GOMF_M7G_5_PPPN_DIPHOSPHATASE_ACTIVITY
DCPS	GOMF_M7G_5_PPPN_DIPHOSPHATASE_ACTIVITY；GOMF_RNA_7_METHYLGUANOSINE_CAP_BINDING；GOMF_RNA_CAP_BINDING
AGO2	GOMF_RNA_7_METHYLGUANOSINE_CAP_BINDING；GOMF_RNA_CAP_BINDING
CYFIP1	GOMF_RNA_7_METHYLGUANOSINE_CAP_BINDING；GOMF_RNA_CAP_BINDING
EIF4E	GOMF_RNA_7_METHYLGUANOSINE_CAP_BINDING；GOMF_RNA_CAP_BINDING
EIF4E1B	GOMF_RNA_7_METHYLGUANOSINE_CAP_BINDING；GOMF_RNA_CAP_BINDING
EIF4E2	GOMF_RNA_7_METHYLGUANOSINE_CAP_BINDING；GOMF_RNA_CAP_BINDING
EIF4E3	GOMF_RNA_7_METHYLGUANOSINE_CAP_BINDING；GOMF_RNA_CAP_BINDING
GEMIN5	GOMF_RNA_7_METHYLGUANOSINE_CAP_BINDING；GOMF_RNA_CAP_BINDING
LARP1	GOMF_RNA_7_METHYLGUANOSINE_CAP_BINDING；GOMF_RNA_CAP_BINDING
NCBP1	GOMF_RNA_7_METHYLGUANOSINE_CAP_BINDING；GOMF_RNA_CAP_BINDING
NCBP2	GOMF_RNA_7_METHYLGUANOSINE_CAP_BINDING；GOMF_RNA_CAP_BINDING
NCBP3	GOMF_RNA_7_METHYLGUANOSINE_CAP_BINDING；GOMF_RNA_CAP_BINDING
EIF3D	GOMF_RNA_CAP_BINDING
EIF4A1	GOMF_RNA_CAP_BINDING
EIF4G3	GOMF_RNA_CAP_BINDING
IFIT5	GOMF_RNA_CAP_BINDING
LSM1	GOMF_RNA_CAP_BINDING
NCBP2L	GOMF_RNA_CAP_BINDING
SNUPN	GOMF_RNA_CAP_BINDING
METTL1	Tomikawa C. 7-Methylguanosine Modifications in Transfer RNA (tRNA). Int J Mol Sci. 2018 Dec 17;19(12):4080. doi: 10.3390/ijms19124080. PMID: 30562954; PMCID: PMC6320965.
NSUN2	Tomikawa C. 7-Methylguanosine Modifications in Transfer RNA (tRNA). Int J Mol Sci. 2018 Dec 17;19(12):4080. doi: 10.3390/ijms19124080. PMID: 30562954; PMCID: PMC6320965.
WDR4	Tomikawa C. 7-Methylguanosine Modifications in Transfer RNA (tRNA). Int J Mol Sci. 2018 Dec 17;19(12):4080. doi: 10.3390/ijms19124080. PMID: 30562954; PMCID: PMC6320965.
